# Supplementary material for: An Innovative Approach for Preoperative Perforator Flap Planning Using Contrast-enhanced B-flow Imaging
Source: PubMed Central journal article supplement — Plast Reconstr Surg Glob Open. 2021 May 21;9(5):e3547. doi: 10.1097/GOX.0000000000003547 (PMC8140766; doi:10.1097/gox.0000000000003547), 2021-05-21
Supplement: gox-9-e3547-s002.pdf [file gox-9-e3547-s002.pdf]

Supplemental Digital Content1:

Figure 2 that illustrates the perforator flaps and the different ultrasound techniques pdf.

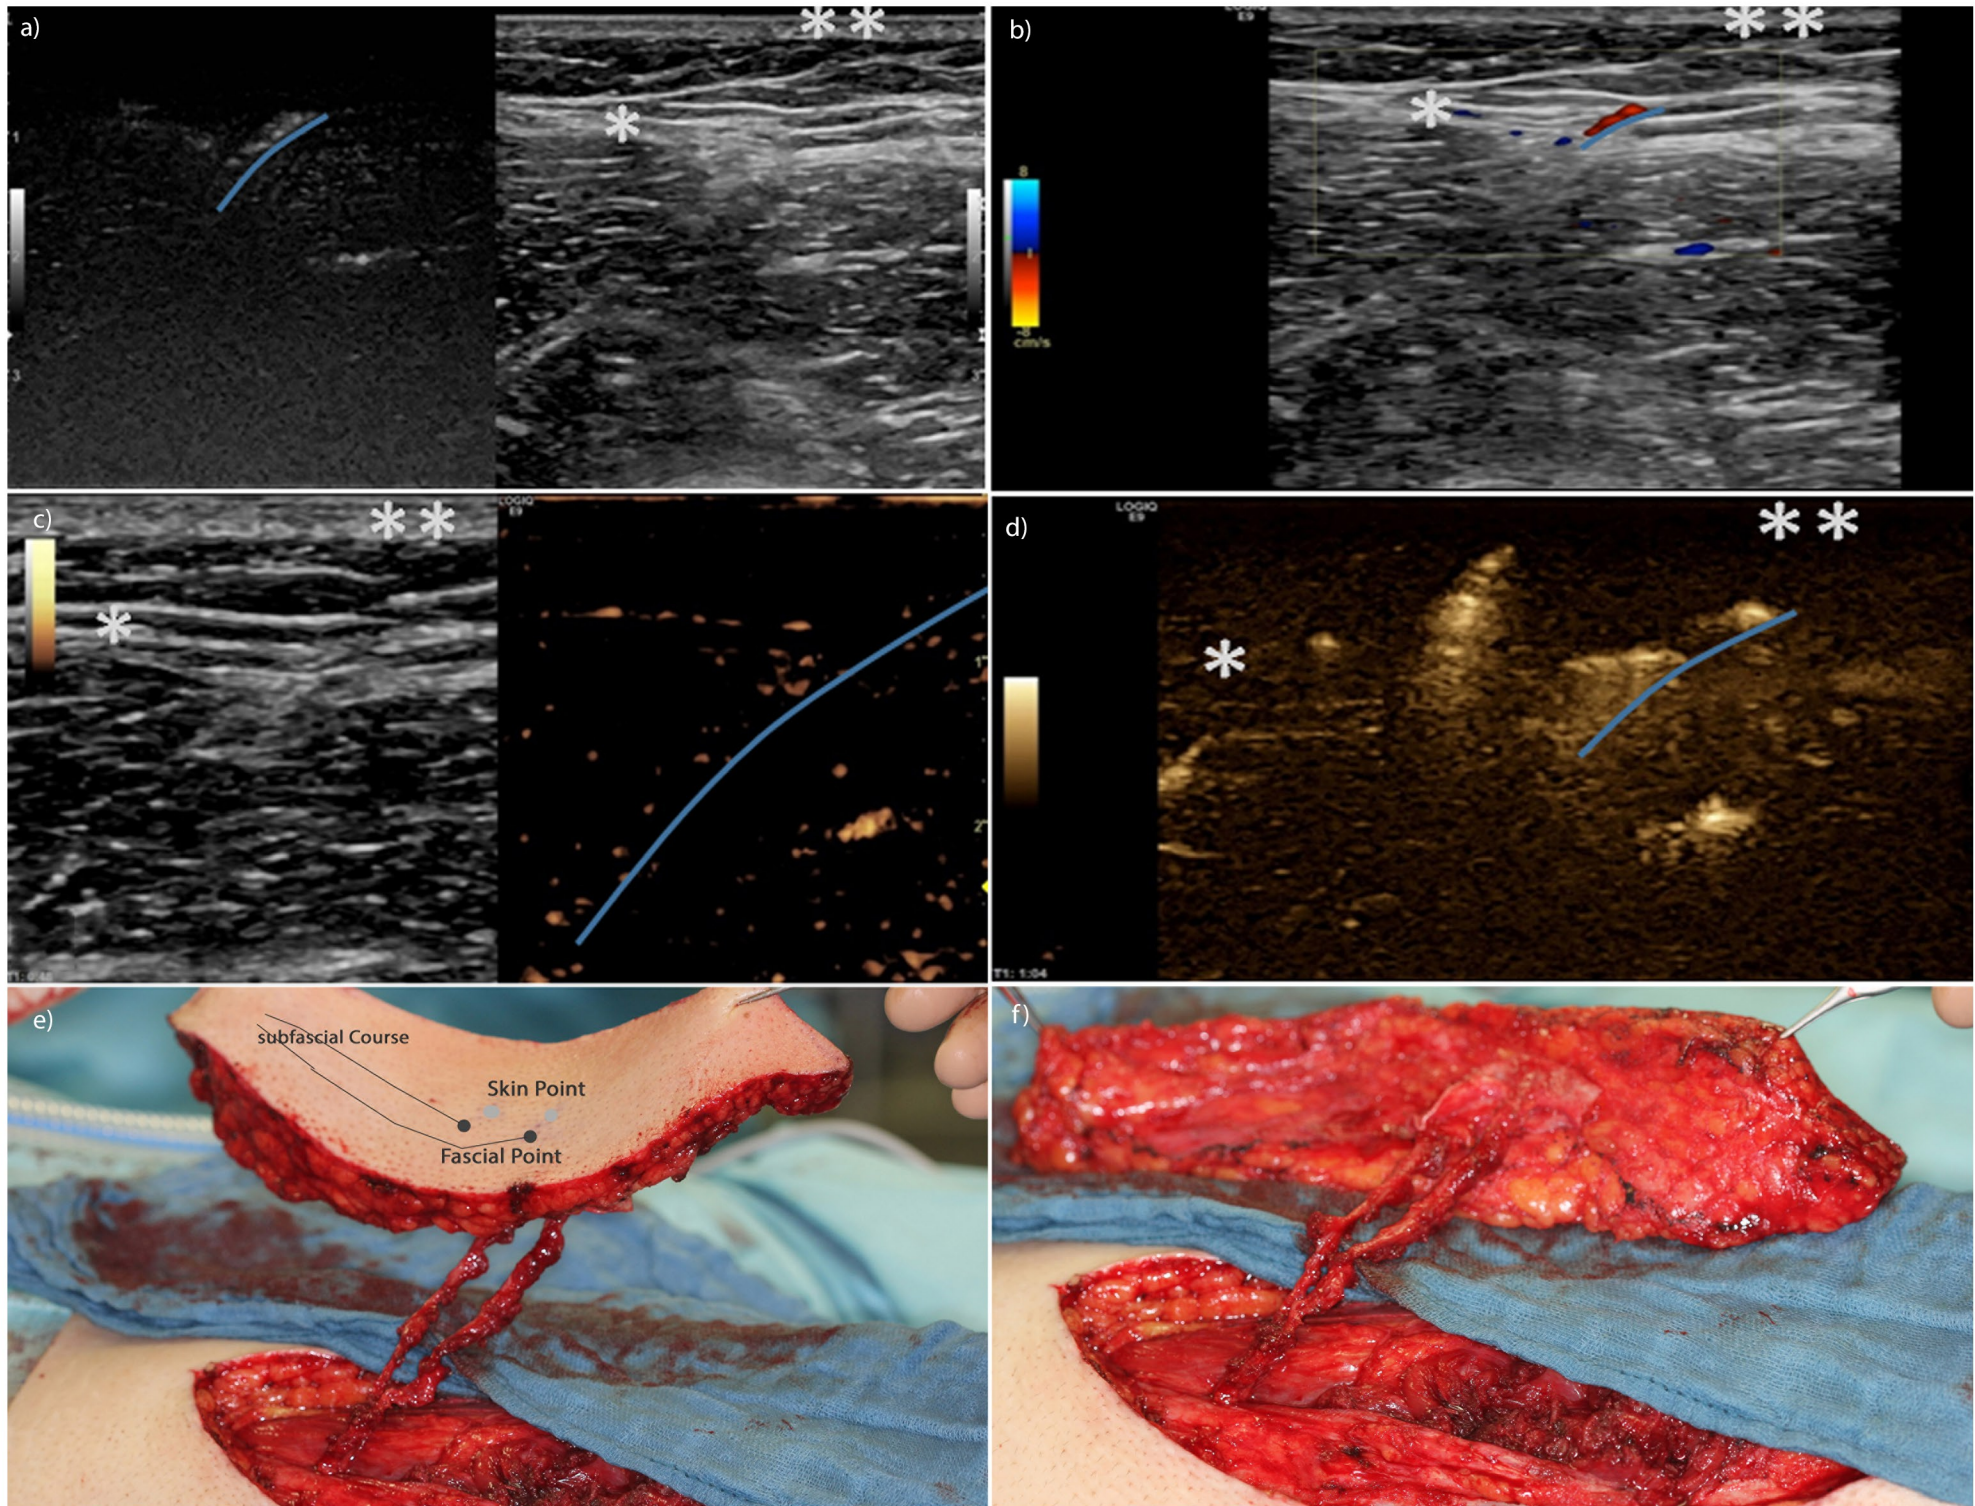

Ultrasound images of perforator mapping **a:** Split screen of a non-contrast B-flow image (left) and a morphological B-mode image (right), **b:** Color-coded Doppler imaging displayed as an overlay of a morphological B-mode image, **c:** Split screen of a non-linear contrast-enhanced ultrasound image (right) and a morphological B-mode image (left); **d:** contrast-enhanced B-Flow image: note the optimized visibility of the perforator and its branches, **Blue line:** Delineated course of a sample vessel. \*: fascia, \*\*: cutis  
**e,f:** Intraoperative photograph of an anterior lateral thigh flap with two perforators. The skin point, fascial point, and subfascial course of the perforator are marked.
